# Supplementary material
Source: PubMed Central journal article supplement (PMC8277744)
Supplement: NIHMS1714285-supplement-ESI.pdf [file NIHMS1714285-supplement-ESI.pdf]

## Supporting Information

# Autonomous Lab-on-Paper for Multiplexed, CRISPR-based Diagnostics of SARS-CoV-2

Kun Yin<sup>1</sup>, Xiong Ding<sup>1</sup>, Ziyue Li<sup>1</sup>, Maroun M. Sfeir<sup>2</sup>, Enrique Ballesteros<sup>2</sup>, and Changchun Liu<sup>1\*</sup>

<sup>1</sup>Department of Biomedical Engineering, University of Connecticut Health Center, 263 Farmington Ave., Farmington, CT 06030, United States

<sup>2</sup>Department of Pathology and Laboratory Medicine, University of Connecticut Health Center, Farmington, CT 06030, United States

### \* Corresponding author

Dr. Changchun Liu  
Department of Biomedical Engineering  
University of Connecticut Health Center  
263 Farmington Avenue  
Farmington, CT 06030  
Phone: (860)-679-2565  
E-mail: [chaliu@uchc.edu](mailto:chaliu@uchc.edu)

**Table S1** RPA primers and Cas12a guide RNAs for N/S gene of SARS-CoV-2 and Human RNase P gene

| Target             | RPA primers / Cas12a guide RNA | Sequence (5'-3')                                     |
|--------------------|--------------------------------|------------------------------------------------------|
| N gene             | RPA forward primer             | AGGCAGCAGTAGGGGAACTTCTCCTGCTAGAAT                    |
|                    | RPA reverse primer             | TTGGCCTTTACCAGACATTTTGCTCTCAAGCTG                    |
|                    | Cas12a guide RNA               | UAAUUUCUACUAAGUGUGAUGCUGCUUGACAGAUU<br>GAAC          |
| S gene             | RPA forward primer             | AGGTTTCAAACCTTTACTTGCTTTACATAGA                      |
|                    | RPA reverse primer             | TCCTAGGTTGAAGATAACCCACATAATAAG                       |
|                    | Cas12a guide RNA               | UAAUUUCUACUAAGUGUGAUGCAGCACCAGCUGUCCAA<br>CCUGAAGAAG |
| Human RNase P gene | RPA forward primer             | CGCAACAACCTCAGCCATCCACATCCGAGTC                      |
|                    | RPA reverse primer             | TATCACGGAGGGGATAAGTGGAGGAGTGTC                       |
|                    | Cas12a guide RNA               | UAAUUUCUACUAAGUGUGAUAUUACUUGGGUGUGACC<br>CU          |

**Table S2** Ct values of real-time RT-PCR for N gene detection of SARS-CoV-2 in clinical samples.

| <b>Samples</b> | <b>Ct values</b> | <b>Samples</b> | <b>Ct values</b> |
|----------------|------------------|----------------|------------------|
| 1              | Not Detected     | 12             | 19               |
| 2              | 29               | 13             | Not Detected     |
| 3              | Not Detected     | 14             | Not Detected     |
| 4              | Not Detected     | 15             | 16               |
| 5              | 23               | 16             | Not Detected     |
| 6              | Not Detected     | 17             | Not Detected     |
| 7              | Not Detected     | 18             | 20               |
| 8              | Not Detected     | 19             | Not Detected     |
| 9              | 21               | 20             | 18               |
| 10             | Not Detected     | 21             | 27               |
| 11             | Not Detected     |                |                  |

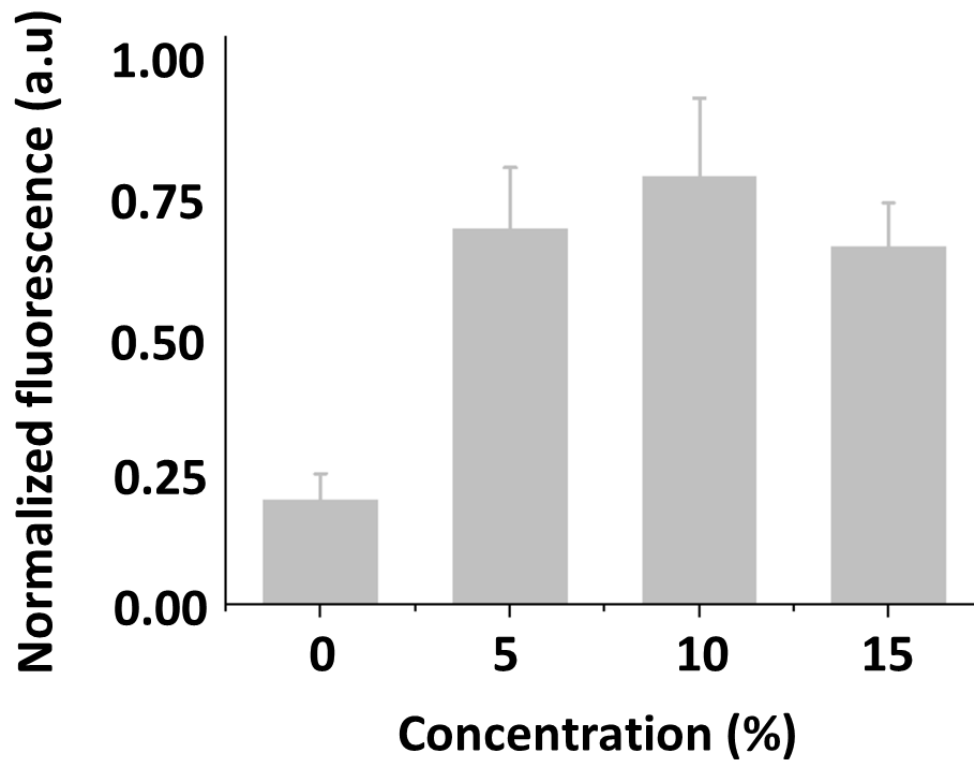

**Figure. S1** Optimization of the trehalose's concentration for dry storage of CRISPR reagents. Error bars denote s.d. (n=3).

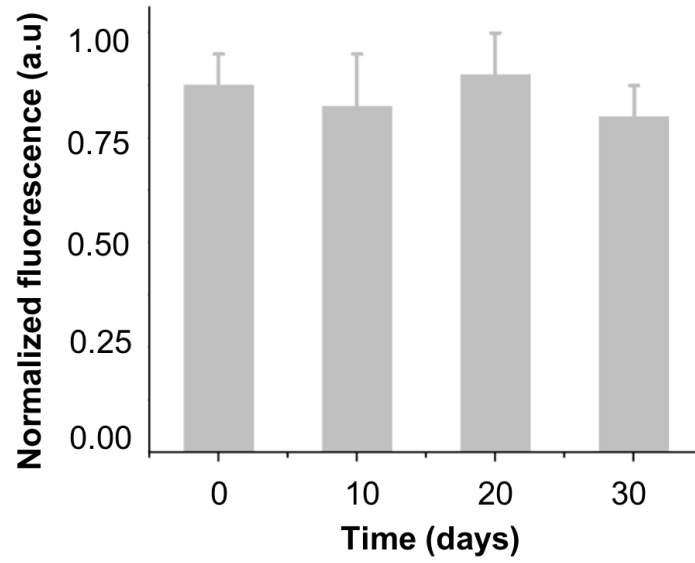

**Figure. S2** Stability of pre-stored CRISPR/Cas12a reagents on the paper-based detection chambers. Error bars denote s.d. (n=3).
